# Supplementary material for: Comparative transcriptomics of Central Asian Vitis vinifera accessions reveals distinct defense strategies against powdery mildew
Source: PubMed Central journal article supplement — Hortic Res. 2015 Aug 26;2:15037–. doi: 10.1038/hortres.2015.37 (PMC4591678; doi:10.1038/hortres.2015.37), 2015-08-26
Supplement: hortres201537-s1.pdf [file hortres201537-s1.pdf]

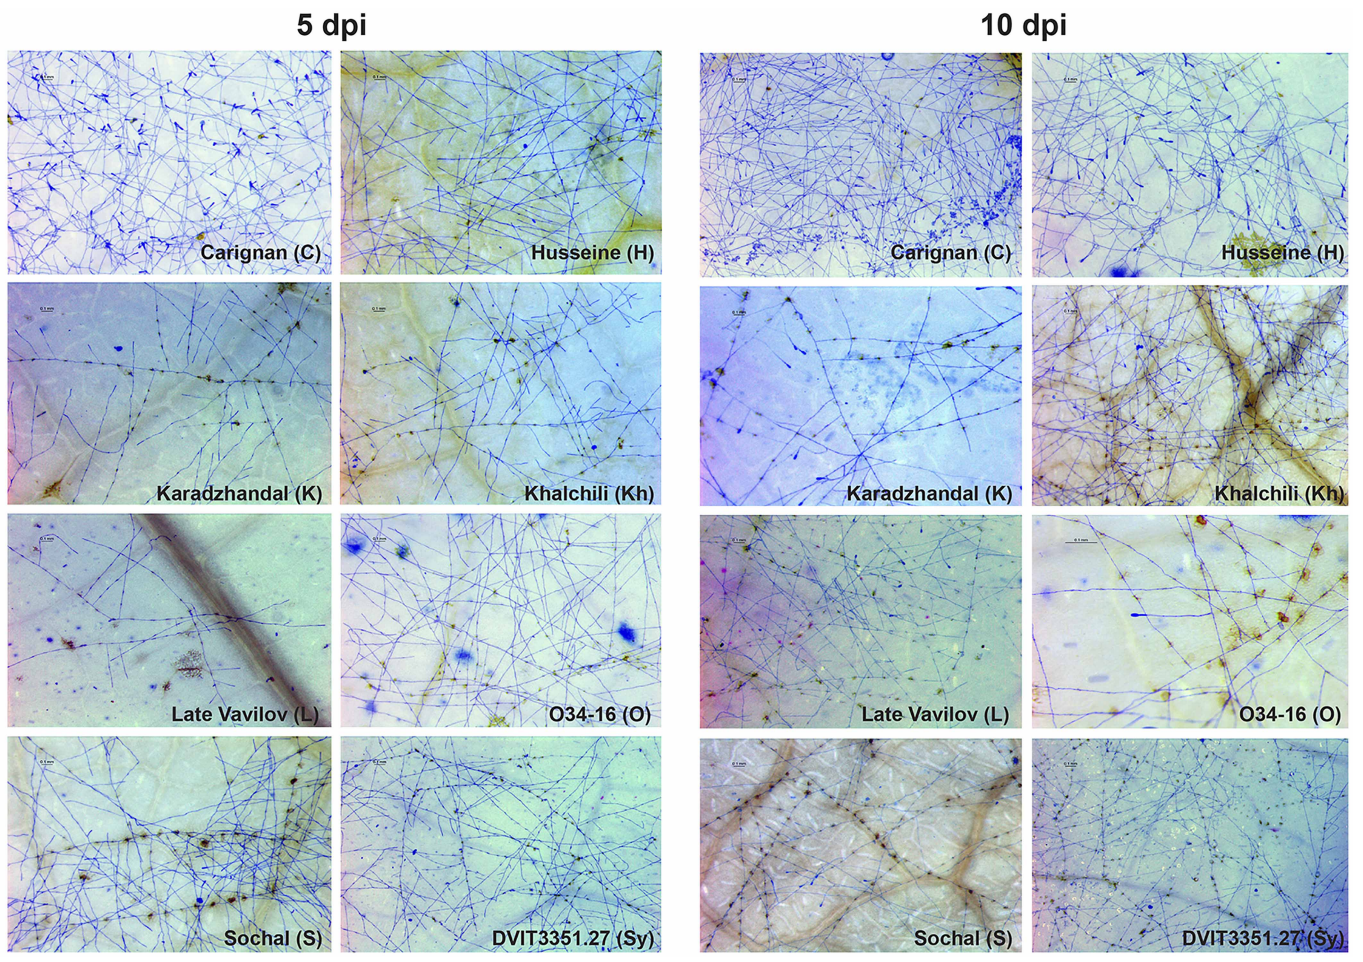

**Figure S1.** Micrographs of *E. necator* infection at 5 and 10 dpi.

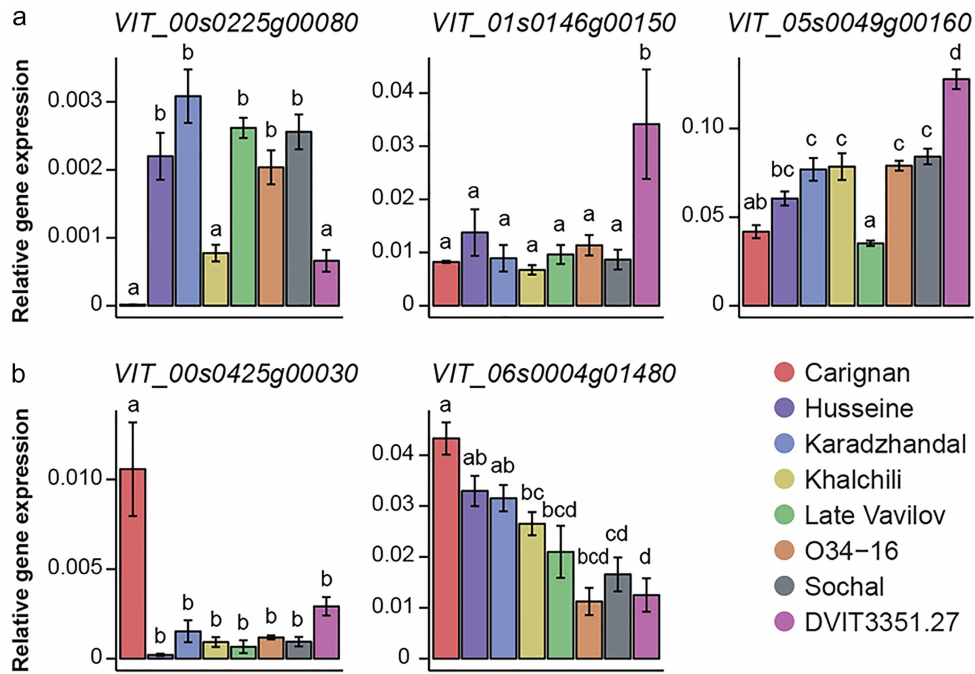

**Figure S2.** Constitutively differentially expressed genes measured by qRT-PCR in completely independent samples. Bar plots represent the relative mean expression of genes based on RNAseq constitutively more highly expressed in the PM-partial resistant accessions (A) or in 'Carignan' (B). Letters correspond to significant differences between accessions ( $P \leq 0.05$ ; error bars indicate SD;  $n = 3$  or 4). Healthy samples from a new independent set of plants were used in this analysis.

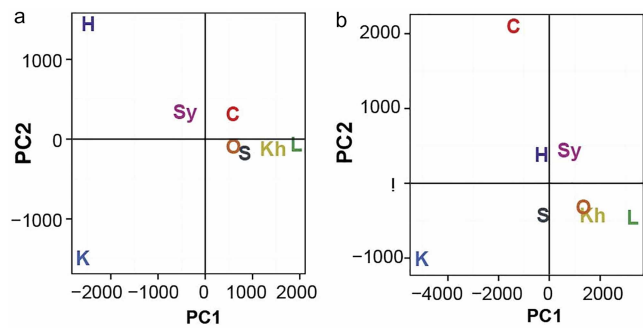

**Figure 53.** Graphical representation of principal coordinate analysis based on pairwise distances calculated from overlaps of differentially expressed genes between accessions at 1 (A) and 5 (B) dpi.

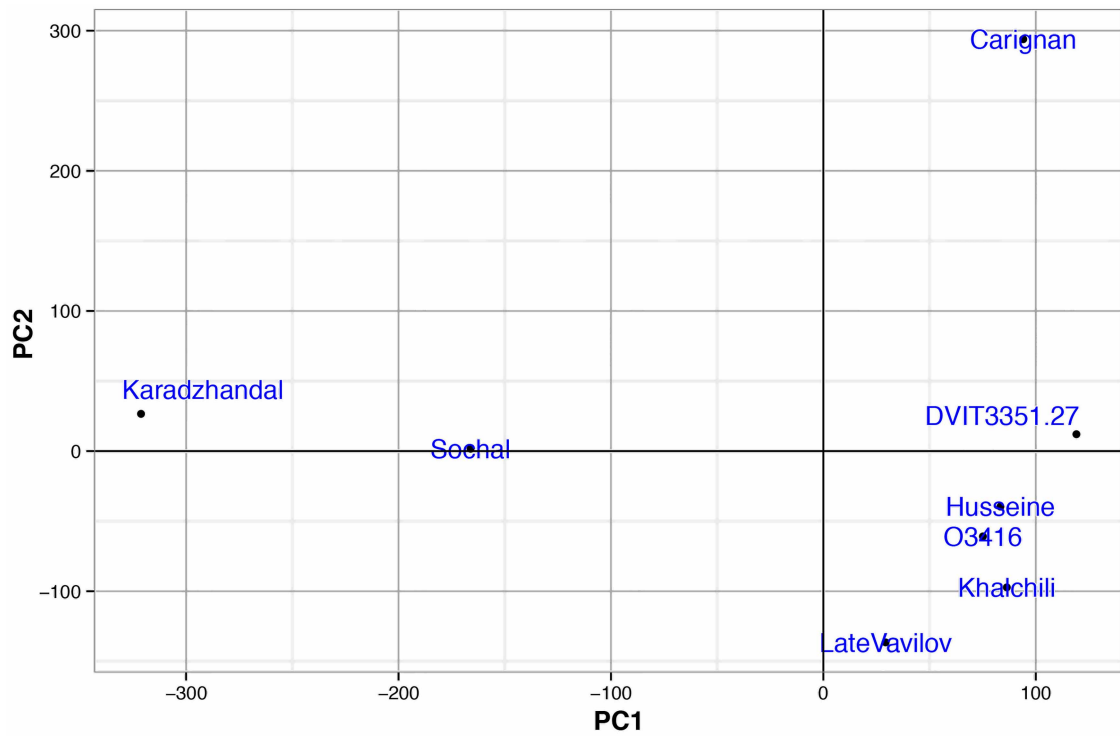

**Figure S4.** Graphical representation of principal coordinate analysis based on pairwise distances calculated from overlaps of GO terms found in differentially expressed genes at 5 dpi.

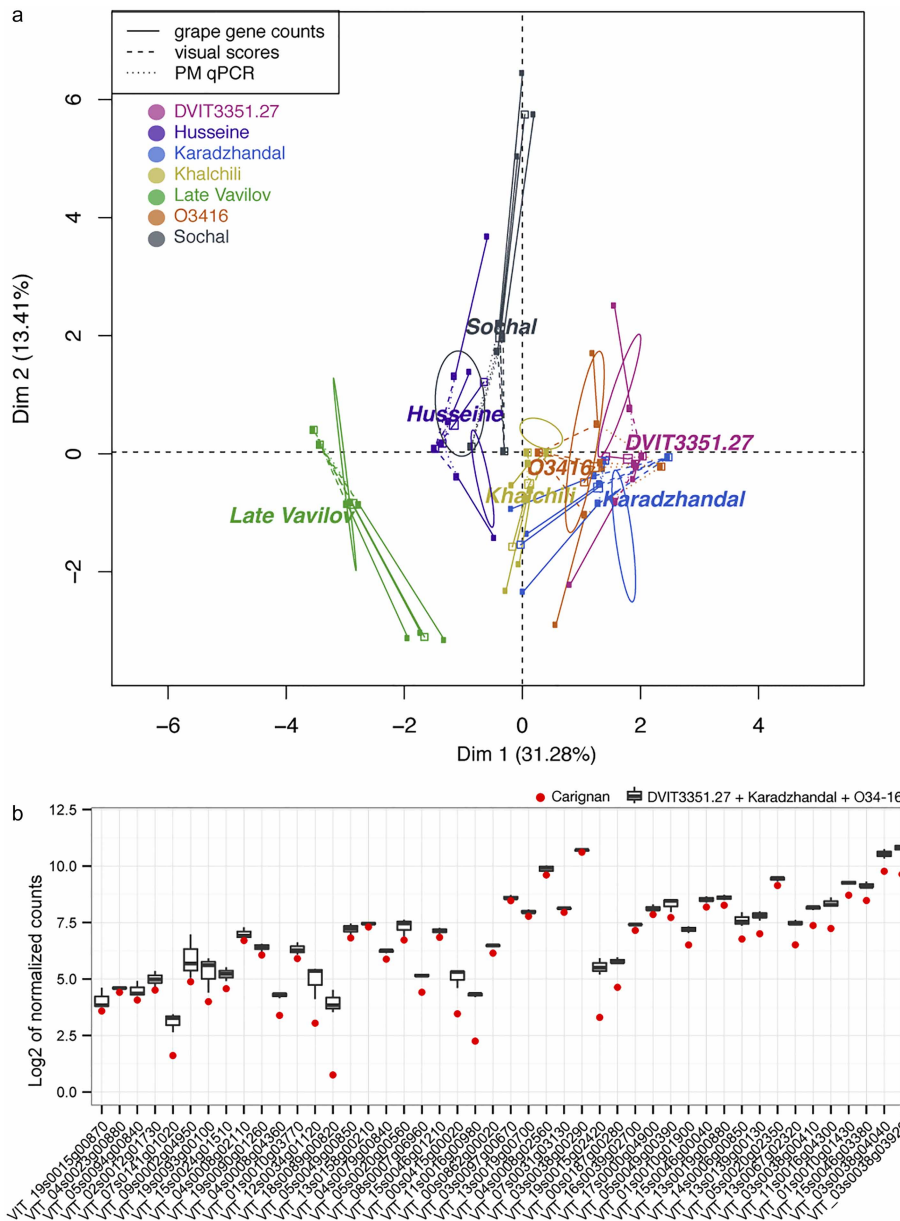

**Figure 55.** (A) Multiple factor analysis (MFA) of the seven PM-partially resistant genotypes using three variables: normalized counts of expressed genes, PM visual scores and *E. necator* biomass measured by qPCR (as previously reported in Figure 1). Each point represents a biological replicate for a given genotype. Ellipses define confidence areas (95%) for each genotype, while black squares represent their correspondent center of gravity. DIM, dimension. (B) Forty-six genes correlated with dimension 1 from panel A ( $R \geq 0.7$ ,  $P < 0.01$ ) with more counts than 'Carignan' in all three most phenotypically resistant accessions 'Karadzhandal' DVIT3351.27 and O34-16.
