# Supplementary material for: Comparative transcriptomics of Central Asian Vitis vinifera accessions reveals distinct defense strategies against powdery mildew
Source: PubMed Central journal article supplement — Hortic Res. 2015 Aug 26;2:15037–. doi: 10.1038/hortres.2015.37 (PMC4591678; doi:10.1038/hortres.2015.37), 2015-08-26
Supplement: hortres201537-s2.pdf [file hortres201537-s2.pdf]

**Supplementary Table S1** - qPCR primer sequences

| Gene Accession    | Functional annotation                          | Forward primer (5'->3') | Reverse primer (5'->3') |
|-------------------|------------------------------------------------|-------------------------|-------------------------|
| VIT_00s0225g00080 | MATE efflux family protein                     | AATCGGAGCAGGATGGCAAG    | GACACCGAAGTGGAGCACAT    |
| VIT_00s0425g00030 | Receptor serine/threonine kinase               | TGGCTTACATCCATCCCTTGC   | TAGCGAGAGACCGAGAGGAC    |
| VIT_01s0146g00150 | BCL-2-associated athanogene 5                  | AGGTGAACGAGACGCTGATG    | GCAATCGCACGCCTAATCAC    |
| VIT_05s0049g00160 | IBR10 (indole-3-butyric acid response 10)      | GCGACAATGAGCACCGACTA    | GGTGATGAGAGCAGAGCCAG    |
| VIT_06s0004g01480 | Lipoxygenase LOX1                              | ACTACTACAAGGACGCGAGCA   | GAGGCCACCCAAGCTATTGT    |
| VIT_18s0001g03610 | Auxin-independent growth promoter              | TCGCATAGCCCCATTTGCTAA   | GCCACCATGTCCTCCTCAAAA   |
| VIT_18s0001g03670 | Zinc finger (C2H2 type) family                 | ACAGCCACCAGCGGAAAAG     | TCTTCTCACCTCCCAGCTAT    |
| VIT_18s0001g05840 | RNA recognition motif (RRM)-containing protein | CAGAGCCTGTATAACCCACAAC  | GCCCTCCATTTGCGTAGGAT    |
| VIT_18s0001g06690 | Gibberellin 20 oxidase 2                       | CGCGGCCAGAACTTGTAAATG   | TTCGTACCGCCCATTTGTCA    |
| VIT_18s0001g08550 | Squalene monooxygenase                         | TTGAAGACTGTGGTGGCTCC    | CCCCAGGAGTAGGATGTGGA    |
| VIT_18s0001g08590 | No hit                                         | AGAAGGCGAACCTCTTGTGAG   | AATTCCTCCGTCAGCAGTCT    |
| VIT_18s0001g10070 | Receptor kinase                                | CAAGTCCTCCAACGTCCTCC    | ATTCGGGTTTCGGGAGCTT     |
